# Supplementary material for: Phylogeographic diversity and mosaicism of the Helicobacter pylori tfs integrative and conjugative elements
Source: Mob DNA. 2018 Jan 26;9:5. doi: 10.1186/s13100-018-0109-4 (PMC5785829; doi:10.1186/s13100-018-0109-4)
Supplement: Supplementary file 2 — Dataset 2. This file contains complete datasets for tfs, com and (partial) cag gene content extracted from 232 Helicobacter strains, additionally including gene/tfs ICE description, classification and nomenclature and relevant strain meta-data. (XLSX 249 kb) [file 13100_2018_109_MOESM2_ESM.xlsx]

## Sheet: Strain data
																				tfs4 left flank 1 (L1)							tfs4 left flank 2 (L2)										tfs4 central region 1 and 2 (C1 and C2)
																			Known gene name/reference	xer							xer										methylase
																			Variable[V] gene identifier14									t4_V1		t4_V2					t4_V3		t4_V419			t4_V5		t4_V6	t4_V7	t4_V8		t4_V9	t4_V10	t4_V11	t4_V12.1/.2
																			Core conserved [C] gene identifier14	t4_C1.1	t4_C2.1	t4_C3.1	t4_C4	t4_C5.1	t4_C6.1		t4_C1.2		t4_C2.2		t4_C3.2	t4_C4	t4_C5.2	t4_C6.2				t4_C7	t4_C8		t4_C9.1/.2				t4_C10.1/.2
																			tfs3 'pz' homologue15	pz40	pz34	pz35	pz15	pz32	pz31		pz40	pz37	pz34		pz35	pz15	pz32	pz31			pz21	pz29	pz28		pz41				pz20	pz20
																			'vir' gene homologue16		virB6								virB6									virC1			virD2				virD4
Region	Helicobacter pylori strain1	Genome assembly3	NCBI Contigs4	Reference5	GenBank Accession No. (Genome)6	GenBank Accession No. (Plasmid)6	Strain origin7	MLST Population	Disease (notes)7	tfs3 status8	tfs4 status8	cag status9	tfs4 L-C-R representation10	Indicated tfs4 L-C-R subtype11	Allelic profile of tfs3 variable gene subset12	Encoding gene of the mechanosensitive ion channel domain-containing protein (MICDCP)	tfs insertion proximal to MICDCP (gene number)13
Europe	HPAG1	CG + P	1	Oh JD et al 2006	CP000241	CP000242	Sweden	hpEurope	Chronic atrophic gastritis			P				963
	Lithuania75	CG+P	1	Kersulyte D et al 2010 (UP)	CP002334	CP002335	Lithuania	hpEurope		F	F	P	C2fR2f		0,0,1,1	4985											p8309frag										p8329frag	p8334	p8339		p8344	p8354			p8359
	26695	CG	1	Tomb JF et al 1997	AE000511		UK	hpEurope	Gastritis	F	F	P	C1f, R2		1,1,0,0	983	t3_C3.1 (990)										1009											1000	1001	1002	1003, 1004		1005		1006
	Rif1	CG	1	Momynaliev K et al 2013	CP003905		UK	hpEurope	Gastritis (26695 derivative)	F	F	P	C1f, R2		0,1,0,0	5075	t3_C3.1 (5115)			5220																		5165	5170	5175	na (fs)		5190	5195	5200
	Rif2	CG	1	Momynaliev K et al 2013	CP003906		UK	hpEurope	Gastritis (26695 derivative)	F	F	P	C1f, R2		0,1,0,0	5070	t3_C3.1 (5110)			5215																		5160	5165	5170	na (fs)		5185	5190 (fs)	5195
	P12	CG + P	1	Fischer W et al 2012	CP001217	CP001218	Germany	hpEurope	Peptic ulcer disease	F	C	P	L2C1R2	L2C1R2	1,1,0,0	979											437	438	439	440	441	442, 443	444	446	na		447	448	449	450	451		452	453	454	455	456		457
	P79	WGS	430	Clancy CD et al 2012	AIHW01		Germany	hpEurope	(Strain P1 derivative)	F	F	P	C1f, R2		0,1,0,0	8937				20																		6971	6966	6961			6946		6936
	G27	CG + P	1	Baltrus DA et al 2009	CP001173	CP001174	Italy	hpEurope			C	P	L1C1R1	L1C1R1		933				986	985	984	983	982	981												980	979	978	977	976		975	na	974	973	972		971
	B38	CG	1	Thiberge JM et al 2010	FM991728		France	hpEurope	Gastric MALT lymphoma		F					976
	908	CG	1	Devi SH et al 2010	CP002184		France	hspWAfrica	Duodenal ulcer		F	P	L2fC1fR1f			995	t4_C17.1 (997)										1015, 1014																	1013	1012	1011	1010		1009
	2017	CG	1	Avasthi TS etal 2011	CP002571		France	hspWAfrica	as 908 (10yrs post 1st isolation)		F	P	L2fC1fR1f			961	t4_C17.1 (963)										9771, 9772																	976	975	974	973		972
	2018	CG	1	Avasthi TS etal 2011	CP002572		France	hspWAfrica	as 908 (10yrs post 1st isolation)		F	P	L2fC1fR1f			965	t4_C17.1 (967)										9811, 9812																	980	979	978	977		976
	HUP-B14	CG + P	1	Kersulyte D & Berg DE 2012 (UP)	CP003486	CP003487	Spain	hpEurope		F		P			1,1,1,0	4770
W. Africa (The Gambia)	Gambia94/24	CG + P	1	Kerslyte D et al 2010 (UP)	CP002332	CP002333	The Gambia	hspWAfrica		C	C	P	L2C1R1f	L2C1R1f	1,1,1,1	5090	t4_C17.1 (5100)										5275	na (fs)	na (fs)	5250	5245	5235	na (fs)	na (fs)	5210		na (fs)	5195	5190	5185	na (fs)		5170	5165	5160	5155	5150		5145
	GAM42Ai	WGS	166	Weinstock G et al 2012 (UP)	APEB01		The Gambia	hspWAfrica			C	P	L1fC1R1	L1C1R1		352							1346, 1345	1344	1342												1341, 1340	1339	1338	1337, 1336	1335		1333	1332	1331	1330	1329		1328
	GAM112Ai	WGS	238	Weinstock G et al 2012 (UP)	APCZ01		The Gambia	hspWAfrica			C	P	L1fC1R1	L1C1R1		763						935	934, 933	932	930												929, 928	927	926	924, 925	923		921	920	919	918	917		916
	GAM71Ai	WGS	197	Weinstock G et al 2012 (UP)	APEC01		The Gambia	hspWAfrica		F	C		L1, C1R1	L1C1R1	1,1,1,1	390				621	622	623, 134	135	136	137			945										1219	1218	1217	1216		1215	1214	1213	1212	1211		1210
	GAM80Ai (I)	WGS	162	Weinstock G et al 2012 (UP)	APED01		The Gambia	hspWAfrica			C	P	L2C1f, C2fR2	L2C2R2		358									896		457	458, 459	460	461	462	463	464	465	466		467, 425	424	423	429	430, 431		432	433	434, 435
	GAM80Ai (II)																																								670	669			667			666	665
	GAM100Ai	WGS	174	Weinstock G et al 2012 (UP)	ANFP01		The Gambia	hspWAfrica		C	F	P	L2, R1f		1,1,1,1	150	t4_C17.1 (153)										624	625	413	414	415	416	417	418	420		423								763
	GAM105Ai	WGS	176	Weinstock G et al 2012 (UP)	APCY01		The Gambia	hspWAfrica		C	F	P	L2f		1,1,1,1	422	t4_C2.2 (425)										427	426	425
	GAM114Ai	WGS	126	Weinstock G et al 2012 (UP)	APDA01		The Gambia	hspWAfrica		F		P			1,1,1,1	1546									414												415, 416, 417
	GAM115Ai	WGS	206	Weinstock G et al 2012 (UP)	APDB01		The Gambia	hspWAfrica		C	C	P	L2, C1R1f	L2C1R1f	1,1,1,1	344	t4_C17.1 (342)										921	922	923	924	925	928	930	931	933			320	321	322	323, 324, 325		327	328	329, 330	331	332		333
	GAM117Ai	WGS	218	Weinstock G et al 2012 (UP)	AWER01		The Gambia	hspWAfrica		F	F	P	L2f, R1		1,0,0,0	97	t4_C21.1 (95)										84, 85	86
	GAM120Ai	WGS	179	Weinstock G et al 2012 (UP)	APDF01		The Gambia	hspWAfrica		C	C	P	L2, C1R1f	L2C1R1f	1,1,1,1	466	t4_C17.1 (468)										1085	1086	1087	1088	1089	1091, 1092	1094	1095	1097			487	486	485	484		483	482	481, 480	479	478		477
	GAM201Ai	WGS	175	Weinstock G et al 2012 (UP)	APDC01		The Gambia	hspWAfrica			C		L1C1R1	L1C1R1		95				688	687	686	685	684	682												680	679	678	677	676		674	673	672, 671	670	669		668
	GAM231Ai	WGS	216	Weinstock G et al 2012 (UP)	APDI01		The Gambia	hspWAfrica		F	?		L1, L2. C1R1	?	1,1,1,1	1093				1509	1510	1511	687	633	632		1150	513, 211	514	515	516	687	1210	1211	1212			1655	1654	1653	1652		1650	1649	1648	1647	1646		1645
	GAM244Ai	WGS	225	Weinstock G et al 2012 (UP)	APDK01		The Gambia	hspWAfrica		F	F		L2		1,1,1,1	751											211	212, 213	214	215	216	217	218	219	220		221, 222						49
	GAM245Ai	WGS	178	Weinstock G et al 2012 (UP)	APDL01		The Gambia	hspWAfrica		F	F	P	L2		1,1,1,1	707	t3_C9 (705)											669	670	671	672	673	675	676	678		679, 680
	GAM246Ai	WGS	192	Weinstock G et al 2012 (UP)	APDM01		The Gambia	hspWAfrica		C	C	P	L2C2R1f	L2C2R1f	1,1,1,1	953	t4_C17.1 (951)										922	923, 924	925	926	927	928	929	930	931		932, 933	935	936		938	939			940			941	942
	GAM254Ai	WGS	171	Weinstock G et al 2012 (UP)	APDS01		The Gambia	hspWAfrica			C	P	L2fL1C1R1	L1C1R1		847				654	962	963	896	895	893		955, 956	957	958, 959	960	961						892, 891	890	889	888	887		885, 824	884	883	882	881		880
	GAM264Ai	WGS	178	Weinstock G et al 2012 (UP)	APDX01		The Gambia	hspWAfrica		F	F		L2		1,1,1,1	711											638	743, 744, 745		746	747, 748	749	212	215	217		216, 218
	GAM121Aii	WGS	183	Weinstock G et al 2012 (UP)	APDG01		The Gambia	hspWAfrica		C	C	P	L2, C1R1f	L2C1R1f	1,1,1,1	66	t4_C17.1 (70)											367, 393	366	365	364	363	361	359	358			91	90	89	88		86	85	84	84	83		82
	GAM270ASi	WGS	175	Weinstock G et al 2012 (UP)	APEA01		The Gambia	hspWAfrica		C	F	P	L2, C1		1,1,1,1	367	t4_V17 (366)										1		230	231								353	354	355	356		357	358	359		361		362
	GAM93Bi	WGS	236	Weinstock G et al 2012 (UP)	APEG01		The Gambia	hspWAfrica			C	P	L2, C1R1f	L2C1R1f		35	t4_C17.1 (33)										356, 357	354, 345	353	351	348, 350	346, 347	345	343	342		341, 340	17	16	15	14				1009, 18	19	20		21
	GAM103Bi	WGS	161	Weinstock G et al 2012 (UP)	APCX01		The Gambia	hspWAfrica			C	P	L2C1R1f	L2C1R1f		375	t4_C17.1 (377)										413, 414	412	410, 411	409	408	406, 407	405	402, 403	401		400	398	397	396	395		393		391	390	389		388
	GAM118Bi	WGS	215	Weinstock G et al 2012 (UP)	APDD01		The Gambia	hspWAfrica		F	C	P	L2, L1C1R1	L1C1R1	1,1,1,1	59	t3_C9 (61)			3	2	1	496	457	458			1115	1114	1113	1112	496	312	311	310			459	460	461	462		162	163	164	165	166		167
	GAM119Bi	WGS	172	Weinstock G et al 2012 (UP)	APDE01		The Gambia	hspWAfrica		C	C	P	L2, C1R1f	L2C1R1f	1,1,1,1	232	t4_C17.1 (230)											907	908, 909	910	911	913	915	917	918			209	210	211	212		214	215	216	216	217		218
	GAM210Bi	WGS	193	Weinstock G et al 2012 (UP)	APDH01		The Gambia	hspWAfrica			C	P	L2C1R1f	L2C1R1f		576	t4_C17.1 (578)										619	618	617	616	614, 615	610, 611, 612	609	608	607		606, 604	603	602	601	600		599		597, 596	595	594		593
	GAM239Bi	WGS	231	Weinstock G et al 2012 (UP)	APDJ01		The Gambia	hspWAfrica		C	C		L1, C1R1	L1C1R1	1,1,1,1	1200				1427	1426	1425	1424	1422, 1423	1421													1025	1024	1023	1022		1021	1020	381		379		378
	GAM263BFi	WGS	173	Weinstock G et al 2012 (UP)	APDW01		The Gambia	hspWAfrica		F	C	P	L2f, L1, C1R1	L1C1R1	1,1,1,1	201	t3_C9 (203)			181	180	179	229	228	226		874	876	679	678	677						225, 224	523	524	525	526		528	529	530	531	532		533
	GAM265BSii	WGS	203	Weinstock G et al 2012 (UP)	APDY01		The Gambia	hspWAfrica			C	P	L2C1R1f	L2C1R1f		489	t4_C17.1 (491)										528	526	524, 525	523	522	521	519	518	516		515	514	513	512	511		509	508	507	506	505		504
	GAM101Biv	WGS	184	Weinstock G et al 2012 (UP)	APCW01		The Gambia	hspWAfrica		F	C		L1C1R1	L1C1R1	1,1,1,1	582				129	128	127	125	124	123												121	119	118	117	116		114	113	112	111	110		109
	GAM83T	WGS	128	Weinstock G et al 2012 (UP)	APEF01		The Gambia	hspWAfrica			C		L2f, L1, C1R1	L1C1R1		1192	t4_C1.1 (1190)			1190	1189	1188	572	577	578			285	286	287	288						579	352	351	350	349		348	347	346	345, 344	343		342
	GAM83Bi	WGS	181	Weinstock G et al 2012 (UP)	APEE01		The Gambia	hspWAfrica			C		L2f, L1, C1R1	L1C1R1		518	t4_C1.1 (516)			516	515	514	513	250	249			299	298	297	296						248	419	420	421	422		423	424	425	426, 427	428		429
	GAM249T	WGS	162	Weinstock G et al 2012 (UP)	APDN01		The Gambia	hspWAfrica			C	P	L2C1R1f	L2C1R1f		283	t4_C17.1 (281)										245, 246	247	248	249	250	252, 253	255	258	259		260, 261	262	263	264	265		266	267	268	269	270		271
	GAMchJs106B	WGS	125	Weinstock G et al 2012 (UP)	APEI01		The Gambia	hspWAfrica		F	F		L2		1,1,1,1	108												1008, 1009	1007	1006	1005	1004	1003	1002	1001		1000, 999, 998
	GAMchJs114i	WGS	182	Weinstock G et al 2012 (UP)	APEJ01		The Gambia	hspWAfrica		F	C		L2C2R2	L2C2R2	1,1,1,1	404											609	610	612	613	614	615	616	617	618		619	620	621		623	624			625			626	627
	GAMchJs117Ai	WGS	173	Weinstock G et al 2012 (UP)	APEK01		The Gambia	hspWAfrica		F	C		LmC1R1	LmC1R1	1,1,1,1	248											1303	851	852	853	854	855	856	857			858, 859	860	861	862	863		865	866	867	868	869		870
	GAMchJs124i	WGS	174	Weinstock G et al 2012 (UP)	APEL01		The Gambia	hspWAfrica		F	?		L2, L1, C1R1	?	1,1,1,1	139				394	395	396	397	60	61		1474	1472, 1473	1471	1470	1469		1128	1126, 1127	1125			283	282	281	280		278	277	276	275	274		273
	GAMchJs136i	WGS	149	Weinstock G et al 2012 (UP)	APEM01		The Gambia	hspWAfrica		F	F	P	L2,C1f, R1f		1,1,1,1	211	t4_C17.1 (212)										959	960	961		513	512	510	509	507		506, 505, 502								522, 521	520	519		518
	HP116Bi	WGS	174	Weinstock G et al 2012 (UP)	APEN01		The Gambia	hspWAfrica		F	C	P	L2, C1R1f	L2C1R1f	1,1,1,1	325	t4_C17.1 (327)											67	68	69	70	71	72	73	74			346	345	344	343		342	341	340	340	339		338
	GAM260Bi	WGS	197	Weinstock G et al 2012 (UP)	APDU01		The Gambia	hspWAfrica		F	?	P	Lm, C1R1f	LmC1R1f?	1,1,1,1	146	t4_C17.1 (148)										566	565	564	563	562	560	559	558				167	166	165	164		163, 162	161	160, 159	158	157		156
	HP260Bi	WGS	190	Weinstock G et al 2012 (UP)	APFC01		The Gambia	hspWAfrica			?	P	Lm, C1R1f	LmC1R1f?	1,1,1,1	326	t4_C17.1 (328)										1089	1090	1091	1092	1093	1095	1096	1098				347	346	345	344		343, 342	341	340, 339	338	337		336
	GAM260ASi	WGS	206	Weinstock G et al 2012 (UP)	APDT01		The Gambia	hspWAfrica			?	P	Lm, C1fR1f	LmC1R1f?		164	t4_C17.1 (166)										581	580	578	577	576	575	574	572			571, 570	787	788	789	790		791	792	793	794	795		796
	GAM268Bii	WGS	189	Weinstock G et al 2012 (UP)	APDZ01		The Gambia	hspWAfrica			?	P	Lm, C1fR1f	LmC1R1f?		55	t4_C17.1 (57)										84	83	80, 81	79	78	77	76	74			73, 72	89	88	87	86		98	97	96	95	94		93
	HP260AFi	WGS	187	Weinstock G et al 2012 (UP)	APEY01		The Gambia	hspWAfrica			?	P	Lm, C1fR1f	LmC1R1f?		28	t4_C17.1 (26)										419	420	422, 423	424	425	426	427	429			430, 431	641	642	643	644		645	646	647	648	649		650
	HP260AFii	WGS	197	Weinstock G et al 2012 (UP)	APEZ01		The Gambia	hspWAfrica			?	P	Lm, C1fR1f	LmC1R1f?		97	t4_C17.1 (95)										793	794	796	797	798	799	800	802			803, 804	387	388	389	390		391	392	393	394	395		396
	HP260ASii	WGS	198	Weinstock G et al 2012 (UP)	APFA01		The Gambia	hspWAfrica			?	P	Lm, C1fR1f	LmC1R1f?		67	t4_C17.1 (69)										306	305	303	302	301	300	299	297			296, 295	316	315	314	313		312	311	310	309	308		307
	GAM260BSi	WGS	203	Weinstock G et al 2012 (UP)	APDV01		The Gambia	hspWAfrica			F		C1f, R1			195	t4_C10.1 (204)																							212	211		206	205	204
	HP260BFii	WGS	123	Weinstock G et al 2012 (UP)	APFB01		The Gambia	hspWAfrica			F		C1f, R1			167																								506	505		1184	1183	1182
S. Africa	SouthAfrica7 (I)	CG + P	1	Duncan SS etal 2013	CP002336	CP002337	South Africa	hpAfrica2			C		L1C1R1	L1C1R1		4940				4590	4595	4600	4605	na (fs)	4620												4625	4630	4635	4640	4645		4650	4655	4660	4665	4670		4675
	SouthAfrica7 (II)										C		LmC2R2	LmC2R2													7710	7705	7700	7695	7690	7685	na (fs)	7670 (fs)			7665	7660	7655		7650	7640			7635			7630	7625
	SouthAfrica20	CG	1	Duncan SS etal 2013	CP006691		South Africa	hpAfrica2			C		L1C1R1	L1C1R1		1048				1106	1107, 1008	1109	1110	1111	1112												1113	1114	1115	1116	1117, 1118		1119	1120	1121	1122	1123		1124
	SouthAfrica50	WGS	2	Duncan SS etal 2013	AVNI01000000		South Africa	hpAfrica2			C		L1C1R1	L1C1R1		733				1005	1006	1007	1008, 1009	1010, 1011	1012												1013, 1014	1015	1016	1017, 1018	1019, 1020, 1021		1022	1023	1024		1025		1026
	A45	WGS	66	Manolov et al 2012 (UP)	AMYU01		Russia	hpAsia2/hpEurope	Peptic ulcer & chronic gastritis	C	C		L1, C1R1	L1C1R1	3,3,2,(1)	5923				5600	5605	5610	5615	5620	5625													7701	7706	7711			7726	7731	7736	7741	7746		7751
	51	CG	1	Kim S et al 2004	CP000012		South Korea	hspEAsia	Duodenal ulcer	F	F	P	C1f			913	t4_C10.1 (915)																				923 (fs)	922	921	920	918		917	916	915
	52	CG	1	Kim S et al 2004	CP001680		Korea	hspEAsia				P				949
Japan I	CPY1313	WGS	10	Blanchard TG et al 2013	AKNK01		Japan	hspEAsia	Duodenal ulcer	F	F	P	L2f, R2f		3,2,4,2	4											734	736, 737
	CPY1662	WGS	18	Blanchard TG et al 2013	AOTT01		Japan	hspEAsia	Duodenal ulcer		C	P	L2, C2R2	L2C2R2		1081											9	8	7	6	4, 3	2					772	773	774		775	777			778			779	780
	CPY3281	WGS	16	Blanchard TG et al 2013	AKNM01		Japan	hspEAsia(hspAmerind)	Duodenal ulcer		C	P	L2f, L1C1R1	L1C1R1		1201				1181	1180	1179	1178	1177, 1176, 1175	1174		149, 150	151, 152									1173, 1172	1171	1170	1169	1168		1167	1166	1165	1164	1163		1162
	CPY1124	WGS	26	Blanchard TG et al 2013	AKNJ01		Japan	hspEAsia	Gastric ulcer		F	P	L2f, R2			1352											350, 349	351
	CPY1962	WGS	16	Blanchard TG et al 2013	AKNL01		Japan	hspEAsia	Gastric ulcer	F		P			2,2,2,2	1372																											955
	CPY6081	WGS	18	Blanchard TG et al 2013	AKNN01		Japan	hspEAsia	Gastric cancer		C	P	L2f, L1C1R1, R2	L1C1R1		606				1351	1350	1349	1348, 1347	1346	1345		99	100									1344	1343	1342	1341	1340		1339	1338	1337	1336	1335		1334
	CPY6261	WGS	10	Blanchard TG et al 2013	AKNO01		Japan	hspEAsia	Gastric cancer	F	F	P	L1C1f		2,2,2,2	1687				132	131, 130	129	128	127	126												125	124	123	122
	CPY6271	WGS	16	Blanchard TG et al 2013	AKNP01		Japan	hspEAsia(hspAmerind)	Gastric cancer		C	P	L2f, L1C1R1, R2	L1C1R1		1038				761	760	759	758	757	756		813	811									755	754	753	752	751			749	748	747	746		745
	CPY6311	WGS	18	Blanchard TG et al 2013	AKNQ01		Japan	hspEAsia	Gastric cancer	C	F	P	L2f, R2		2,2,2,2	1021											156	158
Japan II	F16	CG	1	Furuta Y et al 2011	AP011940		Japan (Fukui)	hspEAsia	Gastritis			P				965
	F30	CG + P	1	Furuta Y et al 2011	AP011941	AP011942	Japan (Fukui)	hspEAsia	Duodenal ulcer		F	P	R2			360											1167	1166
	F32	CG + P	1	Furuta Y et al 2011	AP011943	AP011944	Japan (Fukui)	hspEAsia	Gastric cancer	F		P			2,3,2,2	380
	F57	CG	1	Furuta Y et al 2011	AP011945		Japan (Fukui)	hspEAsia(hspAmerind)	Gastric cancer		C	P	L2f, L1C1R1, R2	L1C1R1		989				311	310	309	308	307, 306, 305	304		147	148									303	302	301	300	299		298	297	296	295	294		293
	OK113	CG	1	Yahara K et al 2013	AP012600		Japan (Okinawa)	hspEAsia(hspAmerind)	Duodenal ulcer	C		P			3,2,2,2	988				362
	OK310	CG + P	1	Yahara K et al 2013	AP012601	AP012602	Japan (Okinawa)	hspEAsia	Gastric cancer	F		P			3,3,4,2	926
	98-10	WGS	51	McCalin MS et al 2009	ABSX00000000		Japan	hspEAsia	Gastric cancer	F	F	P	L2f, R2		2,2,2,0	883g2											886g11	886g13
	XZ274	CG	1	Guo Y et al 2012	CP003419		China	hspEAsia	Gastric cancer		C	P	L1C1R1, R2f	L1C1R1		1150				723 (fs)	722	721	720	719	718												716, 713, 712 (fs)	711	710	709	708		707	706	705	704	703		702
	XZ274 (tfs4 ICE circular intermediate)	CI	1		CP003420		China	hspEAsia	Gastric cancer		F		C1R1																								p03 (frag)	p04	p05	p06	p07		p08	p09	p10	p11	p12		p13
	India7	CG	1	Kersulyte D et al 2014 (UP)	CP002331		India	hpAsia2		C	F	P	L2fC1f		3,3,4,1	5000											8100	na (fs)	8120									8125	8130	8135	na (fs)		8150	8155
	SNT49	CG + P	1	Kersulyte D et al 2014 (UP)	CP002983	CP002984	India (West Bengal)	hpAsia2	Asymptomatic		C	P	L1C1R1	L1C1R1		5055				325	330	335	na (fs)	350	355												360	365	370	375	380		385	390	395	400	405		410
Malaysia	UM037	CG	1	Rehvathy V et al 2013	CP005492		Malaysia (Indian)	hpEurope	Stomach fundus tumor	F	F	P	L2		0,1,1,0	6710, 7975											4240	4245	na (fs)	4260	4240, 4265	4235	4230
	UM067	WGS	44	Rehvathy V et al 2013	AUSN00000000		Malaysia (Indian)	hpAsia2/hpEurope	Peptic ulcer disease	F	F	P	L1fC1f		2,(2),1,1	8260				7325	7330																	7335	7340	7345	7350		7355		7360	7365	7370
	UM114	WGS	36	Rehvathy V et al 2013	AUSS00000000		Malaysia (Indian)	hpAsia2/hpEurope	Peptic ulcer disease	C	F	P	L1fC1f		2,(2),2,2	5805				8500	8495	8490																8485	8480	8475	8470		8465	8460	8455	8450	8445
	UM038	WGS	44	Rehvathy V et al 2013	AUSL00000000		Malaysia (Chinese)	hspEAsia	Nonulcer dyspepsia	C	F	P	L1f, R2f		2,2,2,(1)	6535				2560	2555																						7265
	UM085	WGS	50	Rehvathy V et al 2013	AUSP00000000		Malaysia (Chinese)	hspEAsia	Nonulcer dyspepsia	F	F	P	L2		2,2,2,2	3170											4795	4800	4805	4810	4815	4820
	UM111	WGS	38	Rehvathy V et al 2013	AUSR00000000		Malaysia (Chinese)	hspEAsia	Nonulcer dyspepsia		C	P	L2C2R2	L2C2R2		5875											3470	3475	3480	3485	3490	3495		3500	7690		7700	7705	7710		7715	7725	5010		7730			7735	7740
	UM023	WGS	34	Rehvathy V et al 2013	AUSK00000000		Malaysia (Chinese)	hspEAsia	Peptic ulcer disease	C		P			2,2,2,1	7280
	UM066	CG	1	Rehvathy V et al 2013	CP005493		Malaysia (Chinese)	hspEAsia	Peptic ulcer disease	F	C	P	L1C1R1	L1C1R1	2,2,0,(2)	2535, 6255				6650	6645	6640	6635	na (fs)	6615												6610	6605	6600	6595	6590		6585	6580	6575	6570	6565		6560
	UM077	WGS	53	Rehvathy V et al 2013	AUSQ00000000		Malaysia (Chinese)	hspEAsia	Peptic ulcer disease	F		P			2,2,2,(2)	4995																											2200
	UM084	WGS	34	Rehvathy V et al 2013	AUSO00000000		Malaysia (Malay)	hpAsia2	Peptic ulcer disease	F	F	P	L1fC1f		2,0,2,1	5530				8175	8170	8165																8160	8155		8150		8145	8140		8135	8130
	35A	CG	1	Muzny D et al 2010	CP002096			hspEAsia	Peptic ulcer disease		F	P	R2			21215
	83	CG	1	Muzny D et al 2010	CP002605			hspEAsia	Peptic ulcer disease	F	F	P	L1C1f		2,2,2,2	1035				1514	1513	1512	1511, 1510	1509	1508												1507	1506, 1505	1504	1503
	NCTC 11637	WGS	326		AIHX01		Australia	hpEurope			F	P	L1			8499				3619	3614	3609	3604	3599
	BM012A	CG	1	Linz B et al 2013	CP006888		Australia	hpEurope(hpAsia2)	Gastritis	F	F	P	L2f, L1fC1f, R2		1,1,0,0	686							374	375	385		1323	1328	1327	1326	227						384	383	382	381	380, 56		379	378	377
	BM012S	CG	1	Linz B et al 2013	CP006889		Australia	hpEurope(hpAsia2)	Gastritis	F	F	P	L2f, L1fC1f, R2		1,1,0,0	688							375	376	386		1328	1333	1332	1331	228						385	384	383	382	381, 56		380	379	378
N. America (Canada)	R018c	WGS	30	Blanchard TG et al 2013	AMOQ01		Canada	hpEurope		F	F	P	L1, L2		1,1,1,1	1313	t4_V3 (1323)			1359	1358	1357	1356, 1354, 1353, 1717, 1718, 1317	1352, 1350, 1365, 1321, 1719, 1720, 1721, 1722	1364, 1363, 1362, 1322, 1339, 1723		1373	1372, 1371	1370	1369	1368	1367, 1366			1323			1333
	R030b	WGS	22	Blanchard TG et al 2013	AMOR01		Canada	hpAfrica1 (hpEurope)	Asymptomatic		F	P	L2, Rmf			1219	t4_C17.1 (1223)										1234	1233	1232	1231	1230	1228, 1229
	R32b	WGS	20	Blanchard TG et al 2013	AMOS01		Canada	hpEurope	Asymptomatic		F	P	Lm, C1f, R1f			1311	t4_C1.2 (1314)										1314	1315	1316, 1317	1318	1319	1320	1321								1472, 1467		1468, 1469	1470	1471, 1466
	R036d	WGS	16	Blanchard TG et al 2013	AMOT01		Canada	hpEurope		F	C	P	L2C2R2	L2C2R2		1157											1010	1009	1008	1007	1005	1003		1001	1000		999	998	997		996	994			993			992	991
	R037c	WGS	18	Blanchard TG et al 2013	AMOU01		Canada	hpEurope	Asymptomatic	F	C		L1C1R1	L1C1R1	1,1,1,0	1276				735	734	733	732	731, 730	729												728, 727	725	724	723	722		721	720	719		718		717
	R038b	WGS	28	Blanchard TG et al 2013	AMOV01		Canada	hpEurope	Asymptomatic	F	F		L1, C1fR1			1201				1178	1177	1176	1175	1174	1173												1171, 1172			1152, 1153	1154		1155	1156	1157	1158	1159		1160
	R046Wa	WGS	16	Blanchard TG et al 2013	AMOW01		Canada	hpEurope	Asymptomatic	F	F		L2			398											774, 775	776	777, 778	779	780	781
	R055a	WGS	32	Blanchard TG et al 2013	AMOX01		Canada	hpEurope			C	P	L1C1R1	L1C1R1		1229				1366	1365	1364	1363, 1362	1361, 1360	1359												1357, 1356, 1355	1354	1353	1352	1351, 1350		1348	1347	1346	1345	1344		1343
	R056a	WGS	26	Blanchard TG et al 2013	AMOY01		Canada	hpEurope	Asymptomatic	F	F	P	L1, Lm		1,1,1,1	1414	t4_C6.1 (1418)			1426	1425	1424	1423, 921, 920	1422, 1421, 1420, 919, 918	1419, 1418, 917, 916		1437	1435, 1436	1434	1433	1431	1430	1429	1428, 1427
	CCHI 33	WGS	22	Blanchard TG et al 2013	AOTU01		Canada	hspWAfrica			C	P	L2C1R1f	L2C1R1f		1221	t4_C17.1 (1223)										1256	1255, 1254	1253	1251	1250	1249	1248	1247			1243	1242	1241	1240	1239, 1238, 1237		1236	1235	1234, 1233
	Aklavik86	CG + 2P	1	Kersulyte D et al (2015)	CP003476	CP003477, CP003478	Canada	hspAmerind			F		C1f			5140														6980	6975									6910			1890	1885
	Aklavik117	CG + 2P	1	Kersulyte D et al (2015)	CP003483	CP003484, CP003485	Canada	hspAmerind		C	C		L1, C1R1	L1C1R1?	4,5,3,3	4705				7520	7515	7510	7505	7500	7495												7490	6605 (frag)	6610	6615	6620		6625	6630	6635	6640	6645		6650
N. America (USA)	J99	CG	1	Alm RA et al 1999	AE001439		USA	hspWAfrica	Peptic ulcer disease	F	F	P	L2, R1f		1,1,1,0	915	t4_C17.1 (917)										951	950	949	948	947	946, 945	944, 925	926			927, 928
	B128	WGS	73	McCalin MS et al 2009	ABSY00000000		USA	hpEurope	Gastric ulcer	C	C	P	L2C1fR2	L2C1fR2	1,1,1,1	19g23											190g7	190g6	26g14, 26g13	26g12	26g11, 26g10	26g9	26g8	26g7	26g5		26g4	26g3	26g2	26g1	192g4					192g3	192g2		192g1
	A-6	WGS	24	Blanchard TG et al 2013	AKOR01		USA	hspWAfrica	Gastritis	F	C	P	L2C1R1f	L2C1R1f	1,1,1,0	1072	t4_C17.1 (1074)										1125	1123	1122	1121	1120	1119, 1118	1116	1115	1113		1112, 1111, 1110	1109	1108	1107	1105, 1106		1104	1103	1102	1101, 1089	1088		1087
	A-8	WGS	14	Blanchard TG et al 2013	AKOS01		USA	hspWAfrica	Gastritis		C	P	L2f, L1C1R1f	L1C1R1f		910	t4_C17.1 (913)			945, 944	943	942	941	940	939		523	525									938, 937	936	935	934	933		932	931	930	929	928		927
	A-14	WGS	16	Blanchard TG et al 2013	AKOT01		USA	hpEurope(hpAsia2)	Gastritis		F		L2C1f			996	t4_V8 (1002)										1020	1018	1017	1016	1014	1013	1012	1011	1010		1009, 1008	1007	1006	1005	1004		1003	1002
	A-16	WGS	22	Blanchard TG et al 2013	AKOU01		USA	hspWAfrica	Gastritis		C	P	L2C1R1f	L2C1R1f		1241	t4_C17.1 (1243)										1286	1285		1282	1281	1280, 1278	1277	1274	1272		1270		1268	1267	1266, 1265, 1264		1263	1262	1261, 1260	1259, 1258	1257		1256
	A-26	WGS	18	Blanchard TG et al 2013	AKOV01		USA	hpEurope	Gastritis	F	F		L1fL2C1f		1,1,1,1	1159				1184	1185						1186	1187	1188	1189	1190	1191, 1192	1193	1194	1195		1197, 1236, 1237	1238	1239	1240	1241				1046
	A-27	WGS	16	Blanchard TG et al 2013	AKOW01		USA	hpEurope(hpAsia2)	Gastritis	F	C	P	L1C1R1	L1C1R1	2,(2),1,1	981				64	65	66	67	68	69												71	72	73	74	75		76	77	78	79	80		81
	A-4	WGS	18	Blanchard TG et al 2013	AKOA01		USA	hspWAfrica	Duodenal ulcer		F	P	L2f, R1f			1222	t4_C17.1 (1222)										1233	1232	1231
	A-9	WGS	36	Blanchard TG et al 2013	AKOC01		USA	hpEurope	Duodenal ulcer	C	C	P	L2f, L1, C1R1	L1C1R1	1,1,1,1	822				868	867	866	865	864	863		33	32									861	1568	1569	1570	1571		1572	1573	1574	1575	1576		1577
	A-11	CG	1	Blanchard TG et al 2013	AOTW01		USA	hpEurope(hpAsia2)	Duodenal ulcer	F	C	P	LmC1R1	LmC1R1	1,1,1,1	1327				756									755	754	753	752, 751	750	749			747, 746	744	743	742	741		740	739	738	737	736		735
	A-20	WGS	20	Blanchard TG et al 2013	AKOE01		USA	hspWAfrica	Duodenal ulcer		C	P	L2C1R1f	L2C1R1f		1247	t4_C17.1 (1249)										1290	1289	1288	1286	1284	1283	1282	1280	1278		1277, 1274, 1273	1271	1270	1269	1268		1267	1266	1265	1264	1263		1262
	A-5	WGS	14	Blanchard TG et al 2013	AKOB01		USA	hspWAfrica	Gastric ulcer	C		P			1,1,1,1	1666
	A-17	WGS	12	Blanchard TG et al 2013	AKOD01		USA	hspWAfrica	Gastric ulcer	F	C	P	L2C1R1f	L2C1R1f	1,1,1,0	1102	t4_C17.1 (1102)										1152	1151	1150	1148	1147	1145, 1144	1142	1141	1139		1138	1137	1136	1135	1134		1132	1131	1130, 1129	1128	1117		1116
	H-1	WGS	108	Blanchard TG et al 2013	AOTX01		USA	hspWAfrica	Gastritis	C	C	P	L2C1R1f	L2C1R1f	4,5,3,3	1050	t4_C17.1 (1052)										510	511, 1696	1697	1698	1699	1700, 1701	1702	1703	1705		1086, 1087, 1088	1089	1090	1091	1092, 1070		1069	1068	1067	1066	1065		1064, 1063
	H-3	WGS	22	Blanchard TG et al 2013	AKOX01		USA	hspSAfrica	Gastritis	C	C	P	L1C1R1	L1C1R1	4,5,3,1	1258	t4_V4 (1265)			1275	1274	1273	1272	1271	1270												1268, 1267, 1265, 989, 987, 986	985	984	983	982		981	980	979	978	977		976
	H-4	WGS	18	Blanchard TG et al 2013	AKOY01		USA	hspWAfrica	Gastritis	C	F	P	L1		1,1,1,1	1356				722	721	720	719, 718	717	716												715, 714
	H-5b	WGS	22	Blanchard TG et al 2013	AKQF01		USA	hspSAfrica	Gastritis	C	C	P	L2fL1, C1R1f	L1C1R1f	1,1,1,1	1288	t4_C17.1 (1290)			1538, 1537	1536	1535	1534	1533	1532		1543	1542, 1541	1540								1531, 1530, 1313, 1312	1311	1310	1309	1308		1306	1305	1304	1303	1302		1301
	H-6	WGS	20	Blanchard TG et al 2013	AKOZ01		USA	hspSAfrica	Gastritis	F	C	P	L1, L2, C1R1f, R1	L2C1R1f	0,1,1,1	1144	t4_C17.1 & t3_V4 (1146, 1152)			903, 902	901	900	899, 1777	1776, 1775	1774, 1773		1580	1579	1578, 1577	1576	1575	1768		1766	1764		1763, 1761, 1771, 1769, 1175, 1176	1177, 1178	1179	1180	1181		1182	1184	1185, 1186	1187	1188		1189
	H-9	WGS	24	Blanchard TG et al 2013	AKPA01		USA	hpEurope	Gastritis	F	C	P	L1C1R1	L1C1R1	1,1,1,1	1074	t3_V32 (1082)			1414	1415	1416	1417, 1680	1418, 1679, 1678	1677												1676, 1674	1673	1672	1671	1670		1669	1668	1667	1666	1665		1664
	H-10	WGS	64	Blanchard TG et al 2013	AKPB01		USA	hpAfrica1	Gastritis		F	P	L2, R1f			1230	t4_C17.1 (1232)										1250	1249, 1248	1247	1245	1244	1243, 1242	1241		1237		1235							1104
	H-11	WGS	20	Blanchard TG et al 2013	AKPC01		USA	hpEurope	Gastritis	F	F	P	C1fR2f		1,1,1,0	1226																						1706	1705	1704	1703		1702	1701	1700
	H-18 (I)	WGS	42	Blanchard TG et al 2013	AKPD01		USA	hspWAfrica	Gastritis	C	C	P	L2C1R1f	L2C1R1f	1,1,0,1	1232	t4_C17.1 (1235)										822	820, 819		816	815	814, 813	812	811	810		805, 806, 807, 808, 1261, 1260	1259	1258	1256	1255, 1254		1252	1251	1250, 1249	1248	1247		1246
	H-18 (II)									C	F				4,5,3,0
	H-19	WGS	14	Blanchard TG et al 2013	AKPE01		USA	hspWAfrica	Gastritis		F	P	L2, R1f			1358	t4_C17.1 (1360)										1374	1373	1372	1371	1370	1369	1368	1367			1363						1141
	H-21	WGS	14	Blanchard TG et al 2013	AKPF01		USA	hspWAfrica	Gastritis	F	F		L2fR1f		1,1,1,3	1179	t4_C17.1 (1181)										1190, 1188	1187, 1186	1184
	H-23	WGS	18	Blanchard TG et al 2013	AKPG01		USA	hspWAfrica	Gastritis		C	P	L1C1R1	L1C1R1		977				1495	1494	1493	1492	1491	1490												1488	1487	1486	1485	1484		1483	1482	1481	1480	1479		1478
	H-24b	WGS	20	Blanchard TG et al 2013	AKPY01		USA	hspWAfrica	Gastritis		C	P	L2C1R1f	L2C1R1f		1217	t4_C17.1 (1219)										1255	1254	1253	1251	1249	1248	1247	1246	1244		1242, 1241, 1240		1239	1238	1237, 1236		1235, 1234	1233	1232	1231	1230		1229
	H-24c	WGS	18	Blanchard TG et al 2013	AKPZ01		USA	hspWAfrica	Gastritis		C	P	L2C1R1f	L2C1R1f		1087	t4_C17.1 (1089)										1124	1123	1122	1120	1119, 1118	1117	1116	1115	1113		1111, 1110, 1109		1108	1107	1106		1105, 1104	1103	1102	1101	1100		1099
	H-34	WGS	16	Blanchard TG et al 2013	AKPH01		USA	hspWAfrica	Gastritis	F	F		L2fR1f		1,1,0,1	59	t4_C17.1 (61)										67	66, 65	64
	H-28	WGS	32	Blanchard TG et al 2013	AKOI01		USA	hpEurope	Duodenal ulcer	F	F	P	R1f		0,0,0,1	1340																									298
	H-41	WGS	22	Blanchard TG et al 2013	AKOM01		USA	hspSAfrica	Duodenal ulcer		F	P	L2f, R1f			1118	t4_C17.1 (1122)										1654	1655, 1656	1657	1658	1659, 1660	1661
	H-42	WGS	38	Blanchard TG et al 2013	AKON01		USA	hspWAfrica	Duodenal ulcer	C	C	P	L2C1R1f	L2C1R1f	1,1,1,1	1145	t4_C17.1 (1147)										1229	1228	1177, 1176	1175	1174	1173	1171	1170	1169		1167		1166	1165	1164		1163	1162	1161	1160	1159		1158
	H-43	WGS	24	Blanchard TG et al 2013	AKOO01		USA	hpEurope	Duodenal ulcer	F	F		L2		1,1,1,1	1042											1268	1269	1270	1271	1272	1273	1274	1275	1276		1277
	H-44	WGS	32	Blanchard TG et al 2013	AKOP01		USA	hspWAfrica	Duodenal ulcer	C	F	P	L2fR1f		1,1,1,1	1230	t3_C9 (1232)										904	905		909	910	911
	H-45	WGS	28	Blanchard TG et al 2013	AKOQ01		USA	hpEurope	Duodenal ulcer		C	P	L2C2R2	L2C2R2		1078											1329	1330	1331	1332	1333	1334	1335	1336	1337		1338	1339	1340		1341	1342			1343			1344	1345
	H-16 (I)	WGS	18	Blanchard TG et al 2013	AKOF01		USA	hspWAfrica	Gastric/duodenal ulcer	C	F	P	L2		1,1,0,1	1221	t3_C9 (1223)										1263	1262	1261	1260	1259	1257	1255	1254	1253		1250, 1249
	H-16 (II)									F					4,5,3,3
	H-24	WGS	16	Blanchard TG et al 2013	AKOG01		USA	hspWAfrica	Gastric ulcer		C	P	L2C1R1f	L2C1R1f		1306	t4_C17.1 (1308)										1342	1341	1340	1338	1336, 1337	1335	1334	1333	1331		1329, 1328		1327	1326	1325		1324, 1323	1322	1321	1320	1319		1318
	H-27	WGS	10	Blanchard TG et al 2013	AKOH01		USA	hpEurope	Gastric ulcer	C	F		L1C1f		1,1,1,1	1652				354	353	352	351	350	349																		346	345	344
	H-29	WGS	32	Blanchard TG et al 2013	AKOJ01		USA	hspWAfrica	Gastric ulcer	C	F	P	L2fR1f		1,1,1,3	1171	t4_C17.1 (1173)										1185	1182	1181	1180	1179
	H-30	WGS	26	Blanchard TG et al 2013	AKOK01		USA	hspWAfrica	Gastric ulcer		F	P	L2f			1227	t4_C17.1 (1229)															1232, 1233	1234	1235	1237		1238, 1232
	H-36	WGS	32	Blanchard TG et al 2013	AKOL01		USA	hspWAfrica	Gastric ulcer	F	F	P	L2		4,5,3,1	1285											1577	1576	1575	1574	1573	1572, 1571	1570	1568	1567		1566
	P-1	WGS	12	Blanchard TG et al 2013	AKPI01		USA	hspWAfrica	Gastritis	F	F	P	L2, R1f		1,1,1,1	1252	t4_C17.1(1254)										1296, 1294	1293, 1292	1291	1290	1289	1288	1286	1285	1284		1283
	P-1b	WGS	16	Blanchard TG et al 2013	AKQA01		USA	hspWAfrica	Gastritis	F	F	P	L2, R1f		1,1,1,1	1333	t4_C17.1 (1335)											1374	1373	1372	1371	1370	1368	1367	1366		1364
	P-2	WGS	12	Blanchard TG et al 2013	AKPJ01		USA	hspWAfrica	Gastritis	C	C	P	L2, C1R1	L2C1R1?	4,5,3,1	1104	t4_C1.2 (1106)										1106	1107	1108	1109	1110	1111	1115	1116			1120	1667	1668	1669, 1670	1671, 1672		1674	1675	1676, 1677	1678	1679		1680
	P-2b	WGS	16	Blanchard TG et al 2013	AKQB01		USA	hspWAfrica	Gastritis	C	C	P	L2, C1R1	L2C1R1?	4,5,3,1	1106	t4_C1.2 (1108)										1108	1109	1110	1111	1112	1113	1117	1118			1122, 1301, 1304	1306	1307	1308, 1309	1310, 1311		1313	1314	1315, 1316	1317	1318		1319
	P-3	WGS	22	Blanchard TG et al 2013	AKPK01		USA	hspWAfrica	Gastritis		C	P	L2C1R1f	L2C1R1f		1208	t4_C17.1 (1210)										1244	1243	1242	1241	1240	1239	1238	1237	1236		1234	1233	1232	1231	1230		1229	1228	1227	1223	1222		1221
	P-3b	WGS	18	Blanchard TG et al 2013	AKQC01		USA	hspWAfrica	Gastritis		C	P	L2C1R1f	L2C1R1f		1116	t4_C17.1 (1118)										1137	1138	1139	1140	1141	1142	1143	1144	1145		1146	1147	1148	1149	1150		1151	1152	1153	1131	1130		1129
	P-4	WGS	18	Blanchard TG et al 2013	AKPL01		USA	hspWAfrica	Gastritis		C	P	L2C1R1f	L2C1R1f		1383	t4_C17.1 (1385)										1419, 1418	1417	1416	1415	1414	1413	1411		1409		1408	1407	1406	1405	1404, 1403		1402	1401	1400	1399	1398		1397
	P-4c	WGS	16	Blanchard TG et al 2013	AKQD01		USA	hspWAfrica	Gastritis		C	P	L2C1R1f	L2C1R1f		1404	t4_C17.1 (1406)										1440, 1439	1438	1437	1436	1435	1434	1432		1430		1429	1428	1427	1426	1425, 1424		1423	1422	1421	1420	1419		1418
	P-4d	WGS	18	Blanchard TG et al 2013	AKQE01		USA	hspWAfrica	Gastritis		C	P	L2C1R1f	L2C1R1f		1594	t4_C17.1 (1596)										1630, 1629	1628	1627	1626	1625	1624	1622		1620		1619	1618	1617	1616	1615, 1614		1613	1612	1611	1610	1609		1608
	P-8	WGS	14	Blanchard TG et al 2013	AKPM01		USA	hspWAfrica	Gastritis		C		L2C1R1f	L2C1R1f		1185	t4_C17.1 (1187)										1230	1229		1225	1224	1222, 1218	1216	1215	1214		1213, 1212	1211	1210	1209	1208		1207, 1206	1205	1204, 1203	1202	1201		1200
	P-8b	WGS	12	Blanchard TG et al 2013	AKQG01		USA	hspWAfrica	Gastritis		C		L2C1R1f	L2C1R1f		1078	t4_C17.1 (1080)										1122	1121		1117	1116	1114, 1111	1109	1108	1107		1106, 1105	1104	1103	1102	1101		1100, 1099	1098	1097, 1096	1095	1094		1093
	P-11	WGS	24	Blanchard TG et al 2013	AKPN01		USA	hspWAfrica	Gastritis	F	C	P	L2C1R1f	L2C1R1f	1,1,1,0	1340	t4_C17.1 (1344)										1363	1364, 1365	1366	1367	1368, 1369	1370, 1371, 1376	1377	1380	1382		183, 1385, 1386, 1387	1388	1389	1390	1391, 1392		1393	1394	1395	1396, 1356	1355		1354
	P-11b	WGS	26	Blanchard TG et al 2013	AKQH01		USA	hspWAfrica	Gastritis	F	C	P	L2C1R1f	L2C1R1f	1,1,1,0	1213	t4_C1.2 (1223)										1223	1224	1225	1226	1227, 1228	1229, 1230, 1233	1234	1236	1238		1239, 1241, 1242, 1243	1244	1245	1246	1247, 1248		1249	1250	1251	1252	1263		1264
	P-13	WGS	20	Blanchard TG et al 2013	AKPO01		USA	hspWAfrica	Gastritis	F	C	P	L1, L2f, C1R1	L1C1R1?	4,5,3,1	1300	t3_C9 (1302)			714, 713	712	711	710	709, 708	707		1355	1354	1353								1324, 1326, 1327, 1328, 1329	1330	1331	1332	1333		1334	1335	1336	1337	1338		1339
	P-13b	WGS	16	Blanchard TG et al 2013	AKQI01		USA	hspWAfrica	Gastritis	F	C	P	L1, L2f, C1R1	L1C1R1?	4,5,3,1	1279	t3_C9 (1281)			726, 727	725	724	723	722	721		1334	1333	1332								720, 1302, 1303, 1305, 1306, 1308	1309	1310	1311	1312		1313	1314	1315	1316	1317		1318
	P-15 (I)	WGS	8	Blanchard TG et al 2013	AKPP01		USA	hpEurope	Gastritis	F	C		L2C2R2	L2C2R2	1,1,1,1	1346											1650	1649	1648	1647	1646	1645	1644	1643	1642		1641	1640	1639	1638	1637		1636, 1635	1634	1633, 1632	1632		1631	1630
	P-15 (II)												L1C1f							355	354	353	352, 351	350, 349	348																346		345	344	343
	P-15b (I)	WGS	14	Blanchard TG et al 2013	AKQJ01		USA	hpEurope	Gastritis	F	C		L2C2R2	L2C2R2	1,1,1,1	1611											1654	1653	1652	1651	1650	1649	1640	1641	1642		1643	1644	1645	1646	1647, 554		555	556	557	557		558	559
	P-15b (II)												L1C1f							357	356	355	354	353, 352	351																				349
	P-23 (I)	WGS	6	Blanchard TG et al 2013	AKPR01		USA	hpEurope	Gastritis	C	C		L2C2R2	L2C2R2	1,1,1,1	1394											1566	1567	1568	1569	1571	1572, 1573, 1575	1576	1577	1579		1578	1580	1581		1582	1584			1586, 1587	1587		1588	1589
	P-23 (II)												L1C1f							284	283	282	281	280, 279	278																276		275	274	273	272
	P-25	WGS	6	Blanchard TG et al 2013	AKPS01		USA	hspWAfrica	Gastritis		C	P	L2C1R1f	L2C1R1f		1399	t4_C17.1 (1401)										1438	1437, 1436	1435, 1434	1433	1431	1429	1428	1426	1425		1424	1423	1422	1421	1420, 1419		1418	1417	1416, 1415	1414, 1413	1412		1411
	P-25c	WGS	12	Blanchard TG et al 2013	AKQK01		USA	hspWAfrica	Gastritis	F	C	P	L2C1R1f	L2C1R1f		1242	t4_C17.1 (1244)										1277, 1276	1275	1274	1273	1272	1270	1268	1267	1266		1265	1264	1263	1262	1261		1260	1259	1258, 1257	1256	1255		1254
	P-25d	WGS	20	Blanchard TG et al 2013	AKQL01		USA	hspWAfrica	Gastritis	F	C	P	L2C1R1f	L2C1R1f		1429	t4_C17.1 (1431)										1465, 1464	1463	1462	1461	1460	1457	1455	1454	1453		1452	1451	1450	1449	1448		1447	1446	1445, 1444	1443	1442		1441
	P-26 (I)	WGS	18	Blanchard TG et al 2013	AKPT01		USA	hspWAfrica	Gastritis	F	C	P	Lm, L1, C1R1	L1C1R1	1,1,1,1	662	t4_C1.1 (664)			664	665	666	667, 668	669, 670, 671	672		1176	1177, 1178		1182	1183	1184, 1185	1186, 1187, 1188	1189			673, 1190, 1191, 1192, 1193, 1718, 1717, 1716	1715	1714	1713	1712		1711		1710	1709	1708		1707
	P-26 (II)									F					4,5,3,0
	P-28b	WGS	24	Blanchard TG et al 2013	AKQM01		USA	hpAfrica1	Gastritis	F	C	P	L2C1R1f	L2C1R1f	1,1,1,0	1079	t4_C17.1 (1081)										1122	1121	1120									1116	1115	1114	1112, 1113		1111	1110	1109	1108	1095		1094
	P-30	WGS	10	Blanchard TG et al 2013	AKPU01		USA	hpEurope	Gastritis	C	C		L1C1R1	L1C1R1	1,1,1,2	1657				1509	1510	1511	1512	1513	1514												1516	1517	1518	1519	1520		1521	1522	1523	1524	1525		1526
	P-41	WGS	20	Blanchard TG et al 2013	AKPV01		USA	hspWAfrica	Gastritis	C	F	P	Lm		1,1,1,1	1260	t4_C17.1 (1262)										1280	1279, 1278	1277, 1276	1275	1274	1273	1272, 1267	1266			1264
	P-62	WGS	26	Blanchard TG et al 2013	AKPW01		USA	hspSAfrica	Gastritis	F	F	P	L2, R1f			1111	t4_C17.1 (1113)										1151	1150, 1149	1148	1147	1146
	P-74	WGS	4	Blanchard TG et al 2013	AKPX01		USA	hpEurope	Gastritis	F	F		L1C1f		1,1,1,1	1660				368	367	366	365	364, 363	362												361	360	359	358	357		356	355	354	353
S. America (Colombia)	CG-IMSS-2012	WGS	45	Mendez-Tenorio A et al 2014 (UP)	AWUL01000000		Mexico	hpEurope	Gastric cancer	F	F	P	L2f			1585											4375	4370	4365	4360	4355
	v225d	CG + P	1	Mane SP et al 2010	CP001582	CP001583	Venezuela	hspAmerind	Gastritis			P				1008
	ELS37	CG + P	1	Bertoli MT et al 2011 (UP)	CP002953	CP002954	El Salvador	hpEurope	Gastric cancer	C	F	P	R1f		1,1,1,1	1585
	NQ4044	WGS	34	Blanchard TG et al 2013	AKNW01		Colombia	hpEurope	Intestinal metaplasia	F	C	P	L1C1R1	L1C1R1	1,1,1,1	1313	t3_V4 (1317)			1160	1159	1158	1157	1156	1155												1153, 1151, 1148	1146	1145	1144	1143		1142	1141	1140, 1621, 1316, 1317	1139, 1622	1138		1137
	NQ4200	WGS	28	Blanchard TG et al 2013	AKNS01		Colombia	hpEurope (hpAfrica1)	Intestinal metaplasia	F	F	P	C1f, R1		3,4,4,3	1071	t3_V25.3 (1079)											1406									1095, 1096	1099	1100	1101
	NQ4228	WGS	12	Blanchard TG et al 2013	AKNT01		Colombia	hpEurope	Intestinal metaplasia		C	P	L1, L2f, C1R1f	L1C1R1f		524	t4_C17.1 (522)			633	634	635	636, 638	639	640		630	632									642	643, 502	503	504	505		506	507	508, 509	510	511		512
	NQ4053	WGS	12	Blanchard TG et al 2013	AKNV01		Colombia	hpEurope	Indefinite for metaplasia	F	C		L1f, L2C1R1, R2	L2C1R1		991				1698	1699	1700					1511	1509	1508	1507	1506	1505	1504	1503	1502		1501	1500	1499	1498	1497, 1496		1495	1494	1493	1492	1491		1490
	NQ4099	WGS	12	Blanchard TG et al 2013	AKNU01		Colombia	hpEurope	Indefinite for metaplasia	F		P			3,4,4,3	1254
	NQ4216	WGS	26	Blanchard TG et al 2013	AKNR01		Colombia	hpEurope	Indefinite for metaplasia	C	F	P	R1f		1,1,1,1	1343
	NQ4076	WGS	8	Blanchard TG et al 2013	AKNX01		Colombia	hpEurope	Multifocal atrophic gastritis without metaplasia	F		P			3,4,4,3	1081
	NQ4110	WGS	6	Blanchard TG et al 2013	AKNZ01		Colombia	hpEurope	Multifocal atrophic gastritis without metaplasia	.	F		L1C1f			1159				317	316	315	314, 313	312	311		317										310, 309								306
	NQ4161	WGS	18	Blanchard TG et al 2013	AKNY01		Colombia	hpEurope	Multifocal atrophic gastritis without metaplasia	F	C		L2fC1R1f	L2C1R1f	1,1,1,1	768	t4_C7 (773)										806	805	804								799	773	774	775	776, 777		779	780	781, 785	786, 787	788		789
	PZ5004	WGS	259	Sheh A et al 2013	ASZF00000000		Colombia (Low GC risk region)	hpAfrica1(hpEurope)		F	C	P	L2fC1R1f	L2C1R1f		8880	t4_C16.1 (8885)										840, 835	830, 7075	7070								6995, 6990	6985	6980	6975	6970				8940	8940	8935		8930
	PZ5024	WGS	360	Sheh A et al 2013	ASYS00000000		Colombia (Low GC risk region)	hpAfrica1		C	C	P	L2fC1R1f	L2C1R1f	3,4,4,3	1310	t4_C16.1 (1320)										5780	5785, 7785	7780									5860	5855	5850	5845				1360				1355
	PZ5026	WGS	224	Sheh A et al 2013	ASYT01000000		Colombia (Low GC risk region)	hpEurope (hpAfrica1)		F	C	P	L2C1R1f	L2C1R1f	3,u,1,1	8880	t4_C17.1 (8870)										1850	1845	1840	1835	1830	1825, 7880	7885	7890	7895		7905	8605	8610	8615	8620, 8625, 8630, 8635		8640	8645	8650		8655		8660
	PZ5056	WGS	298	Sheh A et al 2013	ASYU00000000		Colombia (High GC risk region)	hpEurope		F	C	P	L2C1R1f	L2C1R1f		5965	t4_C17.1 (5980)											6135	6130	6125	6120	6110	6105	6100	6095		6005	6010	6015	6020	6025, 6030		6035	6040	6045	6050	6055		6060
	PZ5080	WGS	244	Sheh A et al 2013	ASYV00000000		Colombia (High GC risk region)	hpEurope		C	F	P	R1		3,4,4,3	2965
	PZ5086	WGS	244	Sheh A et al 2013	ASYW00000000		Colombia (High GC risk region)	hpEurope			F	P	Lm			1025											5185	5180, 5175	5170	5165	5160	5155	5150				5145
S. America (Peru)	SJM180	CG	1	Kersulyte D et al 2010 (UP)	CP002073		Peru	hpEurope (hybrid)	Gastritis	F	F	P	Lm, C1f		1,1,1,1	5025											6865	6875	6880	6885	6890	6895	6900	6905			6910								7015	7020
	Shi112	CG	1	Kersulyte D et al 2012 (UP)	CP003474		Peru	hspAmerind	Commensal	C	C	P	L1C1R1	L1C1R1	3,4,4,3	5085				6950	6955	na (fs)	6970	6975	6980												6985	6990	6995	7000	7005		7010	7015	na (fs)	7030	7035		7040
	Shi417	CG	1	Kersulyte D et al 2012 (UP)	CP003472		Peru	hspAmerind	Commensal	C	C	P	L1C1R1	L1C1R1	4,5,3,3	4780				5675	5670	5665	5660	5655	5650												na (fs)	5635	5630	na (fs)	5615		5610	5605	5600	5595	5590		5585
	Shi169	CG	1	Kersulyte D et al 2012 (UP)	CP003473		Peru	hspAmerind	Commensal		C	P	L1C1R1	L1C1R1		5010				1210	1205	1200	1195	1190	1185												na (fs)	1170	1165	na (fs)	1150		1145	1140	1135	1130	1125		1120
	Shi470	CG	1	Kersulyte D et al 2008 (UP)	CP001072		Peru	hspAmerind	Gastritis/atrophy		C	P	L1C1R1	L1C1R1		5200				4480	4485	4490	4495	4500	4505												4510	4515	4520	4525	4530		4535	4540	4545	4550	4555		4560
	Cuz20	CG	1	Kersulyte D et al 2010 (UP)	CP002076		Peru	hspAmerind			C	P	L1C1R1	L1C1R1		5150				1345	1340	na (fs)	1325	1320	1315												na (fs)	1300	1295	1290	1285		1280	1275	1270	1265	1260		1255
	PeCan4	CG + P	1	Kersulyte D et al 2010 (UP)	CP002074	CP002075	Peru	hpEurope (hybrid)	Gastric cancer	F	C	P	LmC1R2	LmC1R2		4965											na (fs)	7835	7830	7825	7820	na (fs)	7805	7800			na (fs)	7785	7780	7775	7770		7765	7760	7755	7750	7745		7740
	PeCan18	CG	1	Kersulyte D et al 2012 (UP)	CP003475		Peru	hpAfrica1(hspSAfrica)	Gastric cancer	C	F	P	L2f		3,4,4,1	4835	t3_C9 (4840)										na (fs)	5065	na (fs)
	Puno120	CG + P	1	Kersulyte D et al 2011 (UP)	CP002980	CP002981	Peru	hspAmerind	Gastritis	F		P			1,(1),u,3
	Puno135	CG	1	Kersulyte D et al 2011 (UP)	CP002982		Peru	hspAmerind	Gastritis	F	F	P	C1R1		3,4,4,3	4870																					na (frag)	5075	5080	na (fs)	na (fs)		5105	5110	5115	5120	5125		5130
	Sat464	CG + P	1	Kersulyte D et al 2010 (UP)	CP002071	CP002072	Peru	hspAmerind		F		P				4825
	Animal isolates/animal adapted
	B8	CG + P	1	Farnbacher M et al 2010	FN598874	FN665651	Germany	hpEurope	as B128 (Gerbil adapted)	C	C	P	L2C1fR2	L2C1R2	1,1,1,1	561	t4_C1.2 (556)										556	555	515, 514	513	512	511	510	509	507		506	505	504	503	501					500 (fs)	499		498
	X47-2AL	WGS	126	Veyrier FJ et al 2013	AWNG01		France	hpEurope	Gastritis (domestic cat)	F	C		L2C2R2	L2C2R2	1,1,0,1	4135													4060, 3515	3520	3525	3530	3535	3540	3545		3550	3555	3560		3565	5715			5720			5725
	M1	WGS	18	Blanchard TG et al 2012 (UP)	AKQN01		USA	hspWAfrica	(Mouse)		C	P	L2C1R1f	L2C1R1f		1301	t4_C17.1 (1303)										1338	1337	1336	1334	1333, 1332	1331	1330	1329	1327		1325, 1324, 1323		1322	1321	1320		1319, 1318	1317	1316	1315	1314		1313
	M2	WGS	22	Blanchard TG et al 2012 (UP)	AKQO01		USA	hspWAfrica	(Mouse)		C	P	L2C1R1f	L2C1R1f		1182	t4_C17.1 (1184)										1219	1218	1217	1215	1214, 1213	1212	1211	1210	1208		1206, 1205, 1204		1203	1202	1201		1200, 1199	1198	1197	1196	1195		1194
	M3	WGS	20	Blanchard TG et al 2012 (UP)	AKQP01		USA	hspWAfrica	(Mouse)		C	P	L2C1R1f	L2C1R1f		1306	t4_C17.1 (1308)										1344	1343, 1342	1341	1339	1338, 1337	1336	1335	1334	1332		1330, 1329, 1328		1327	1326	1325		1324, 1323	1322	1321	1320	1319		1318
	M4	WGS	22	Blanchard TG et al 2012 (UP)	AKQQ01		USA	hspWAfrica	(Mouse)		C	P	L2C1R1f	L2C1R1f		1316	t4_C17.1 (1318)										1352	1351	1350	1348	1347, 1346	1345	1344	1343	1341		1339, 1338		1337	1336	1335		1334, 1333	1332	1331	1330	1329		1328
	M5	WGS	14	Blanchard TG et al 2012 (UP)	AKQR01		USA	hspWAfrica	(Mouse)		C	P	L2C1R1f	L2C1R1f		1345	t4_C17.1 (1347)										1382	1381	1380	1378	1377, 1376	1375	1374	1373	1371		1369, 1368, 1367		1366	1365	1364		1363, 1362	1361	1360	1359	1358		1357
	M6	WGS	22	Blanchard TG et al 2012 (UP)	AKQS01		USA	hspWAfrica	(Mouse)		C	P	L2C1R1f	L2C1R1f		1338	t4_C17.1 (1341)										1378	1377	1376	1374	1373, 1372	1371	1370	1369	1367		1365, 1364, 1363		1362	1361	1360		1359, 1358	1357	1356	1355	1354		1353
	M9	WGS	22	Blanchard TG et al 2012 (UP)	AKQT01		USA	hspWAfrica	(Mouse)		C	P	L2C1R1f	L2C1R1f		1135	t4_C17.1 (1137)										1172	1171	1170	1168	1167, 1166	1165	1164	1163	1161		1159, 1158, 1157		1156	1155	1154		1153, 1152	1151	1150	1149	1148		1147
	UM032	CG	1	Khosravi Y et al 2013	CP005490		Malaysia	hspEAsia	(C57BL/6 mouse adapted)		F	P	L2f, R2			5975											na (fs)	2310
	UM298	CG	1	Khosravi Y et al 2013	CP006610		Malaysia	hspEAsia	(C57BL/6 mouse adapted)		F	P	L2f, R2			7210											3495	3485
	UM299	CG	1	Khosravi Y et al 2013	CP005491		Malaysia	hspEAsia	(C57BL/6 mouse adapted)		F	P	L2f, R2			640											na (fs)	5070
																			Known gene name/reference	xer							xer										methylase
																			Variable[V] gene identifier									t4_V1		t4_V2					t4_V3		t4_V4			t4_V5		t4_V6	t4_V7	t4_V8		t4_V9	t4_V10	t4_V11	t4_V12.1/.2
																			Core conserved [C] gene identifier	t4_C1.1	t4_C2.1	t4_C3.1	t4_C4.1	t4_C5.1	t4_C6.1		t4_C1.2		t4_C2.2		t4_C3.2	t4_C4.2	t4_C5.2	t4_C6.2				t4_C7	t4_C8		t4_C9.1/.2				t4_C10.1/.2
																			tfs3 'pz' homologue	pz40	pz34	pz35	pz15	pz32	pz31		pz40	pz37	pz34		pz35	pz15	pz32	pz31			pz21	pz29	pz28		pz41				pz20	pz20
	Non-pylori Helicobacters2								Disease (host/source)										'vir' gene homologue		virB6								virB6									virC1			virD2				virD4
	H. acinonychis str. Sheeba: Cluster 1	CG + P	1	Eppinger M et al 2006	AM260522	AM260523	Russia		Gastroenteritis (Circus Lion)																				1707frag								na (frag)	1712	1713	1714	1715
	H. acinonychis str. Sheeba: Singles/Other
	H. cetorum MIT 00-7128: Cluster 1	CG + P	1	Kersulyte D et al 2013	CP003479	CP003480	USA		(Beluga whale)
	H. cetorum MIT 00-7128: Cluster 2 (tfs3)
	H. cetorum MIT 00-7128: Singles/Other
	H. cetorum MIT 99-5656: Cluster 1	CG + P	1	Kersulyte D et al 2013	CP003481	CP003482			(White-sided dolphin)
	H. cetorum MIT 99-5656: Cluster 2 (tfs3)
	H. cetorum MIT 99-5656: Cluster 3
	H. cetorum MIT 99-5656: Cluster 4
	H. cetorum MIT 99-5656: Cluster 5
	H. cetorum MIT 99-5656: Singles/Other
	H. suis HS1: Cluster 1 (tfs3)	WGS	272	Vermoote M et al 2011	ADGY01		Belgium?		(Pig gastric mucosa)
	H. suis HS1: Cluster 2
	H. suis HS1: Singles/Other
	H. suis HS5: Cluster 1	WGS	638	Vermoote M et al 2011	ADHO01		Belgium?		(Pig gastric mucosa)
	H. suis HS5: Cluster 2
	H. suis HS5: Singles/Other
	H. bizzozeronii CCUG 35545: Cluster 1	WGS	147	Schott T et al 2012 (UP)	CAGP00000000		Finland		(Dog)
	H. bizzozeronii CCUG 35545: Singles/Other
	H. bizzozeronii CIII-1: Cluster 1	CG	1	Schott T et al 2011	FR871757		Finland		Severe gastritis (Human gastric mucosa)
	H. bizzozeronii CIII-1: Singles/Other
	H. bizzozeronii CIII-1: Plasmid	P	1			FR871758	Finland		Severe gastritis (Human gastric mucosa)
	Helicobacter canis NCTC 12740	WGS	9		AZJJ01				(Human)
	H. cinaedi ATCC BAA-847: Cluster 1	CG	1	Miyoshi-Akiyama T et al 2012	AP012492		USA		Rectal swab (Human)
	H. cinaedi ATCC BAA-847: Singles/Other
	H. cinaedi ATCC CCUG 18818: Cluster 1	WGS	96	Shen Z et al 2014	ABQT01000000		Korea		Bacteremia, Arthritis (Human)
	H. cinaedi ATCC CCUG 18818: Singles/Other
	H. bilis ATCC WiWa	WGS	67	Ward D et al 2013 (UP)	AQFW01		USA		Model colitis (Mouse)
	H. bilis ATCC WiWa
	Notes
	Strains and metadata
	1 Grey shading groups strains according to broadly equivalent geographic regions from which they were isolated.
	Strains highlighted in white are known or apparent derivatives of the preceding listed strain, or as described in 'Disease (notes) column.
	(I) or (II) after a strain name indicates separate, distinct variant tfs ICEs encoded within the same genome
	2tfs-homologous genes in the genomes of non-pylori Helicobacters are entered as distinct contiguous clusters which are most readily described by tfs3 nomenclature. However, sequence similarity of individual genes is variable and the assignment is not intended to reflect relatedness to tfs3 in particular unless stated otherwise elsewhere.
	3Genome assemblies are indicated as either complete (CG) or incomplete, comprising a collection of whole genome shotgun (WGS) sequences. Plasmid sequences are indicated by 'P'. tfs ICE circular intermediates are indicated by 'CI'.
	4NCBI contigs refers to the number of independent contiguous sequences (overlapping sequence reads with no gaps) that comprise the draft genome assembly in the NCBI database
	5Where genome sequence projects remain unpublished (UP), full author information can be found at the relevant NCBI genome project page
	6Genome sequences are accessible at https://www.ncbi.nlm.nih.gov/
	7Information reported where available.
	8tfs ICEs indicated to be either complete (C) or incomplete and significantly fragmented (F)
	9cag status reports cag presence (P)
	10'LCR' nomenclature denotes presence of gene complements contained within defined left flank (L), central (C) or right flank (R) regions of the tfs4 ICE. Numbers identify different conserved gene complements (distinguished by sequence identity and presence of individual genes). Partial/fragmented gene complements within any LCR region are indicated by the suffix 'f'.
	11 Most likely tfs4 LCR types derived for strains in which tfs4 ICEs are indicated to be in predominantly complete based on LCR representation. Sequence-confirmed representatives of each of nine distinct tfs4 LCR ICE types are highlighted in bold.
	12Allelic profiles describe 2-5 distinct sequence variants for each of the four most sequence variable left flank tfs3 ICE genes V24, C3, C2, and V25. A '0' at any particular position in the profile indicates the absence of gene sequences (due to deletion or significant truncation) and 'u' signifies an outlier ('unclassified') gene which does not cluster with other allelic types. Bold highl ight …
	13Identificaton of the insertion context of a particular tfs ICE or fragment proximal to the gene encoding the conserved mechanosensitive ion channel domain-containing protein (MICDCP). Insertion is reported when within a distance of 10 genes proximal to the MICDCP gene.
	tfs gene nomenclature
	14tfs genes are assigned a C or V prefix depending on whether they are (C) conserved in all tfs ICE types, or are (V) variably present, as defined by absence in at least one tfs ICE type. Numbering proceeds as genes are encountered in order in the dataset, first from left to right of tfs4, then left to right of tfs3. Distinct alleles of any particular tfs gene are indicated by additional numberin…
	15pz nomenclature initially used in the early description of the tfs3 ICE from strain PeCan18b (Kersulyte D et al (2003) J. Bacteriol. 185, 3764-3772).
	16tfs genes homologous to vir genes of the Agrobacterium tumefaciens Ti plasmid, encoding essential core proteins required for assembly and/or functional activity of an encoded type IV secretion system.
	tfs gene dataset and annotation
	The full complement and context of ICE genes within the tfs gene pool was determined by manual annotation and comparative analysis of tfs ICE sequences in available complete reference genomes and large contiguous WGS sequences.
	Missing data in unhighlighted cells was subsequently added to CG datasets with relevant annotation and/or reporting gene status as follows; 'na' = not annotated, (fs) = frameshift, (frag) = fragmented/truncated gene.
	A possible additional small open reading frame can be identified within the large intergenic sequence between tfs3 genes t3_V25 and t3_C7. However, this is not annotated in any genome sequence and therefore not included in the dataset.
	Gene numbers prefixed with 'p' denote plasmid encoded genes as identified in the GenBank entry.
	17cag genes for analysis were selected at intervals along the entire length of the cagPAI as an indication of cagPAI presence
	18identification of non tfs associated homologous genes encoded elsewhere within the genome
	19tfs4 t4_V4 methylase gene is highlighted in the colour of the corresponding contiguous L1 or L2 left flank. Conserved region (C1) highlighting is maintained if an associated left flank is not apparent. Red highlighting indicates association of an encoded V4 gene with both left flanks.
	20tfs4 t4_C13 virB9 gene is highlighted in the colour of the corresponding contiguous tfs4 R1 or R2 right flank
	21tfs3 t3_V4 methylase is highlighted in the colour of the tfs4 L1 or L2 left flank if also present in a flanking position.
[truncated: 73 more columns]

## Sheet: References
References
Alm, R.A., Ling, L.-S.L., Moir, D.T., King, B.L., Brown, E.D.,Doig, P.C., Smith, D.R., Noonan, B., Guild, B.C., deJonge, B.L., Carmel, G., Tummino, P.J., Caruso, A., Uria-Nickelsen, M., Mills, D.M., Ives, C., Gibson, R., Merberg, D., Mills, S.D., Jiang, Q., Taylor, D.E.,Vovis, G.F. and Trust, T.J (1999) Genomic-sequence comparison of two unrelated isolates of the human gastric pathogen Helicobact…
Avasthi, T.S., Devi, S.H., Taylor, T.D., Kumar, N., Baddam, R., Kondo, S., Suzuki, Y., Lamouliatte, H., Megraud, F. and Ahmed, N (2011) Genomes of Two Chronological Isolates (Helicobacter pylori 2017 and 2018) of the West African Helicobacter pylori Strain 908 Obtained from a Single Patient. J. Bacteriol. 193, 3385-3386.
Baltrus, D.A., Amieva, M.R., Covacci, A., Lowe, T.M., Merrell, D.S., Ottemann, K.M., Stein, M., Salama, N.R. and Guillemin, K (2009) The complete genome sequence of Helicobacter pylori strain G27. J. Bacteriol. 191, 447-448.
Blanchard, T.G., Czinn, S.J., Correa, P., Nakazawa, T., Keelan, M., Morningstar, L., Santana-Cruz, I., Maroo, A., McCracken, C., Shefchek, K., Daugherty, S., Song, Y., Fraser, C.M. and Fricke, W.F (2013) Genome sequences of 65 Helicobacter pylori strains isolated from asymptomatic individuals and patients with gastric cancer, peptic ulcer disease, or gastritis. Pathog Dis 68, 39-43.
Clancy, C.D., Forde, B.M., Moore, S.A. and O'Toole, P.W (2012) Draft genome sequences of Helicobacter pylori strains 17874 and P79. J. Bacteriol. 194, 2402.
Devi, S.H., Taylor, T.D., Avasthi, T.S., Kondo, S., Suzuki, Y., Megraud, F. and Ahmed, N (2010) Genome of Helicobacter pylori Strain 908. J. Bacteriol. 192, 6488-6489.
Duncan, S.S., Bertoli, M.T., Kersulyte, D., Valk, P.L., Tamma, S., Segal, I., McClain, M.S., Cover,T.L. and Berg, D.E (2013) Genome Sequences of Three hpAfrica2 Strains of Helicobacter pylori. Genome Announc 1 (5), e00729-13.
Eppinger, M., Baar, C., Linz, B., Raddatz, G., Lanz, C., Keller, H., Morelli, G., Gressmann, H., Achtman, M. and Schuster, S.C (2006) Who ate whom? Adaptive Helicobacter genomic changes that accompanied a host jump from early humans to large felines. PLoS Genet. 2 (7), E120.
Farnbacher, M., Jahns, T., Willrodt, D., Daniel, R., Haas, R., Goesmann, A., Kurtz, S. and Rieder, G (2010) Sequencing, annotation, and comparative genome analysis of the gerbil-adapted Helicobacter pylori strain B8. BMC Genomics 11, 335.
Fischer, W., Windhager, L., Rohrer, S., Zeiller, M., Karnholz, A., Hoffmann, R., Zimmer, R. and Haas,R (2010) Strain-specific genes of Helicobacter pylori: genome evolution driven by a novel type IV secretion system and genomic island transfer. Nucleic Acids Res. 38, 6089-6101.
Furuta, Y., Kawai, M., Yahara, K., Takahashi, N., Handa, N., Tsuru, T., Oshima, K., Yoshida, M., Azuma, T., Hattori, M., Uchiyama, I. and Kobayashi, I (2011) Birth and death of genes linked to chromosomal inversion. Proc. Natl. Acad. Sci. U.S.A. 108, 1501-1506.
Guo, Y., Wang, H., Li, Y., Song, Y., Chen, C., Liao, Y., Ren, L., Guo, C., Tong, W., Shen, W., Chen, M., Mao, X., Guo, G. and Zou, Q (2012) Genome of Helicobacter pylori strain XZ274, an isolate from a tibetan patient with gastric cancer in China. J. Bacteriol. 194, 4146-4147.
Kersulyte, D., Bertoli, M.T., Tamma, S., Keelan, M., Munday, R., Geary, J., Veldhuyzen van Zanten, S., Goodman, K.J. and Berg, D.E (2015) Complete Genome Sequences of Two Helicobacter pylori Strains from a Canadian Arctic Aboriginal Community. Genome Announc 3 (2).
Kersulyte, D., Rossi, M. and Berg, D.E (2013) Sequence Divergence and Conservation in Genomes of Helicobacter cetorum Strains from a Dolphin and a Whale. PLoS ONE 8 (12), E83177.
Kersulyte, D., Velapatino, B., Mukhopadhyay, A.K., Cahuayme, L., Bussalleu, A., Combe, J., et al. (2003) Cluster of type IV secretion genes in Helicobacter pylori's plasticity zone. J. Bacteriol. 185, 3764-3772.
Khosravi, Y., Rehvathy, V., Wee, W.Y., Wang, S., Baybayan, P., Singh, S., Ashby, M., Ong, J., Amoyo, A.A., Wee, S.S., Choo, S.W., Perkins, T., Chua, E.G., Tay, A., Marshall, B.J., Loke, M.F., Goh, K.L., Pettersson, S. and Vadivelu, J (2013) Comparing the genomes of Helicobacter pylori clinical strain UM032 and Mice-adapted derivatives. Gut Pathog 5 (1), 25.
Linz, B., Windsor, H.M., Gajewski, J.P., Hake, C.M., Drautz, D.I., Schuster, S.C. and Marshall, B.J (2013) Helicobacter pylori Genomic Microevolution during Naturally Occurring Transmission between Adults. PLoS ONE 8 (12), E82187.
Mane, S.P., Dominguez-Bello, M.G., Blaser, M.J., Sobral, B.W., Hontecillas, R., Skoneczka, J., Mohapatra, S.K., Crasta, O.R., Evans, C., Modise, T., Shallom, S., Shukla, M., Varon, C., Megraud, F., Maldonado-Contreras, A.L., Williams, K.P. and Bassaganya-Riera, J (2010) Host-interactive genes in Amerindian Helicobacter pylori diverge from their Old World homologs and mediate inflammatory response…
McClain, M.S., Shaffer, C.L., Israel, D.A., Peek, R.M. Jr. and Cover, T.L (2009) Genome sequence analysis of Helicobacter pylori strains associated with gastric ulceration and gastric cancer. BMC Genomics 10, 3.
Mendez-Tenorio, A., Larios-Serrato, V., Olguin-Ruiz, G.E., Sanchez-Vallejo, C.J., Torres-Lopez, R.C., Aviles-Jimenez, F., Camorlinga-Ponce, M. and Torres, J (2014) Genome Sequence of a Helicobacter pylori Strain Isolated from a Mexican Patient with Intestinal Gastric Cancer. Genome Announc 2 (1).
Miyoshi-Akiyama, T., Takeshita, N., Ohmagari, N. and Kirikae, T (2012) Complete genome sequence of Helicobacter cinaedi type strain ATCC BAA-847. J. Bacteriol. 194, 5692.
Momynaliev, K., Chelysheva, V., Selezneva, O., Akopian, T., Alexeev, D. and Govorun, V (2013) Complete Genome Sequences of Helicobacter pylori Rifampin-Resistant Strains. Genome Announc 1 (4), e00446-13.
Oh, J.D., Kling-Backhed, H., Giannakis, M., Xu, J., Fulton, R.S., Fulton, L.A., Cordum, H.S., Wang, C., Elliott, G., Edwards, J., Mardis, E.R., Engstrand, L.G. and Gordon, J.I (2006) The complete genome sequence of a chronic atrophic gastritis Helicobacter pylori strain: evolution during disease progression. Proc. Natl. Acad. Sci. U.S.A. 103, 9999-10004.
Rehvathy, V., Tan, M.H., Gunaletchumy, S.P., Teh, X., Wang, S., Baybayan, P., Singh, S., Ashby, M., Kaakoush, N.O., Mitchell, H.M., Croft, L.J., Goh, K.L., Loke, M.F. and Vadivelu, J (2013) Multiple Genome Sequences of Helicobacter pylori Strains of Diverse Disease and Antibiotic Resistance Backgrounds from Malaysia. Genome Announc 1 (5), e00687-13.
Rimbara, E., Matsui, M., Mori, S., Suzuki, S., Suzuki, M., Kim, H., Sekizuka, T., Kuroda, M. and Shibayama, K (2013) Draft Genome Sequence of Helicobacter fennelliae Strain MRY12-0050, Isolated from a Bacteremia Patient. Genome Announc 1 (4).
Schott, T., Rossi, M. and Hanninen, M.L (2011) Genome sequence of Helicobacter bizzozeronii strain CIII-1, an isolate from human gastric mucosa. J. Bacteriol. 193, 4565-4566.
Sheh, A., Piazuelo, M.B., Wilson, K.T., Correa, P. and Fox, J.G (2013) Draft Genome Sequences of Helicobacter pylori Strains Isolated from Regions of Low and High Gastric Cancer Risk in Colombia. Genome Announc 1 (5), e00736-13.
Shen, Z., Sheh, A., Young, S.K., Abouelliel, A., Ward, D.V., Earl, A.M. and Fox, J.G (2014) Draft genome sequences of six enterohepatic Helicobacter species isolated from humans and one from rhesus macaques. Genome Announc 2 (5), e00857-14.
Thiberge, J.M., Boursaux-Eude, C., Lehours, P., Dillies, M.A., Creno, S., Coppee, J.Y., Rouy, Z., Lajus, A., Ma, L., Burucoa, C., Ruskone-Foumestraux, A., Courillon-Mallet, A., De Reuse, H., Boneca, I.G., Lamarque, D., Megraud, F., Delchier, J.C., Medigue, C., Bouchier, C., Labigne, A. and Raymond, J (2010) From array-based hybridization of Helicobacter pylori isolates to the complete genome sequ…
Tomb, J.-F., White, O., Kerlavage, A.R., Clayton, R.A., Sutton, G.G., Fleischmann, R.D., Ketchum, K.A., Klenk, H.P., Gill, S., Dougherty, B.A., Nelson, K., Quackenbush, J., Zhou, L., Kirkness, E.F., Peterson, S., Loftus, B., Richardson, D., Dodson, R., Khalak, H.G., Glodek, A., McKenney, K., Fitzegerald, L.M., Lee, N., Adams, M.D., Hickey, E.K., Berg, D.E., Gocayne, J.D., Utterback, T.R., Peterso…
Vermoote, M., Vandekerckhove, T.T., Flahou, B., Pasmans, F., Smet, A., De Groote, D., Van Criekinge, W., Ducatelle, R. and Haesebrouck, F (2011) Genome sequence of Helicobacter suis supports its role in gastric pathology. Vet. Res. 42, 51.
Veyrier, F.J., Ecobichon, C. and Boneca, I.G (2013) Draft Genome Sequence of Strain X47-2AL, a Feline Helicobacter pylori Isolate. Genome Announc 1 (6).
Yahara, K., Furuta, Y., Oshima, K., Yoshida, M., Azuma, T., Hattori, M., Uchiyama, I. and Kobayashi, I (2013) Chromosome painting in silico in a bacterial species reveals fine population structure Mol. Biol. Evol. 30, 1454-1464.
